# Supplementary material
Source: PubMed Central journal article supplement (PMC8906252)
Supplement: ehp9835.smcontents.508.pdf [file ehp9835.smcontents.508.pdf]

**Note to readers with disabilities:** *EHP* strives to ensure that all journal content is accessible to all readers. However, some figures and Supplemental Material published in *EHP* articles may not conform to [508 standards](#) due to the complexity of the information being presented. If you need assistance accessing journal content, please contact [ehp508@niehs.nih.gov](mailto:ehp508@niehs.nih.gov). Our staff will work with you to assess and meet your accessibility needs within 3 working days.

### **Supplemental Material**

#### **Nationwide Analysis of the Heat- and Cold-Related Mortality Trends in Switzerland between 1969 and 2017: The Role of Population Aging**

Evan de Schrijver, Marvin Bundo, Martina S. Ragettli, Francesco Sera, Antonio Gasparrini, Oscar H. Franco, and Ana M. Vicedo-Cabrera

#### **Table of Contents**

**Table S1.** Second stage random effect meta-regression models.

**Table S2.** Summary statistics of the temperature and mortality series by canton. Total number of all-cause deaths and number of municipalities, and average and interquartile range (IQR) of temperature by decade.

**Table S3.** Cantons and corresponding regions.

**Table S4.** Heat- and cold-related excess deaths and mortality fraction (%) by location computed as separated components for age category and decade.

**Table S5.** Annual heat-related excess deaths and mortality fraction for the 1999-2008 decade (including and excluding the year 2003) computed as separated components for age category.

**Table S6.** Estimation of non-optimal temperature related mortality risk, MMT and MMP by canton and decade for cold and heat for the < 65 age category.

**Table S7.** Estimation of non-optimal temperature related mortality risk, MMT and MMP by canton and decade for cold and heat for the 65-79 age category.

**Table S8.** Estimation of non-optimal temperature related mortality risk, MMT and MMP by canton and decade for cold and heat for the  $\geq 80$  age category.

**Table S9.** Heat- and cold-related excess deaths and mortality fractions (%) by decade for the age adjusted scenario and in the no-ageing scenario in accordance with the 1969/78 age-mortality structure.

**Figure S1.** Spatial boundaries of 2056 municipalities and 26 cantons by region in Switzerland according to the 2019 BFS commune registry.

**Figure S2.** Elevation for Switzerland at a 1x1 km resolution.

**Figure S3.** Population density in Switzerland at a 1x1 km resolution for 2015.

**Figure S4.** Trends in annual all-cause mortality by age-group between 1969 and 2017 in Switzerland.

**Figure S5.** Evolution of population size, expressed as average annual population by age group for each decade in Switzerland between 1969 and 2017.

**Figure S6.** Evolution of the relative increase in population size by age group for each decade in Switzerland compared to 1970.

**Figure S7.** Relationship between canton-specific minimum mortality temperatures (MMTs) and average temperature for each age category for the decade 1969/78 (purple) compared to 2009/17 (yellow). The corresponding minimum mortality percentile (MMP) is denoted as change in size of the point, while a change in decade is denoted by a different colour. All decades have been visualised in Figure S5 of the supplementary file and the corresponding MMT and MMP by age group are provided in Table S5-7.

**Figure S8.** Distribution of the canton-specific relative risks for heat (left panel) at the 99<sup>th</sup> percentile and cold (right panel) at the 1<sup>st</sup> percentile of the temperature distribution for each age category and decade. The shape illustrates the spread and density of the canton-specific relative risks and the colour represents the corresponding decade.
